# Supplementary material for: Exploiting BSA to Inhibit the Fibrous Aggregation of Magnetic Nanoparticles under an Alternating Magnetic Field
Source: Int J Mol Sci. 2013 Mar 12;14(3):5775–83. doi: 10.3390/ijms14035775 (PMC3634418; doi:10.3390/ijms14035775)

## Supporting Information

**Figure S1.** (a) is the SEM image of  $\gamma\text{-Fe}_2\text{O}_3$  nanoparticle aggregates without BSA addition in the presence of a time-varied magnetic field; (b) is the SEM image of  $\gamma\text{-Fe}_2\text{O}_3$  nanoparticles aggregates after BSA addition in the presence of time-varied magnetic field. The excitation current of magnetic field generator is 200 A.

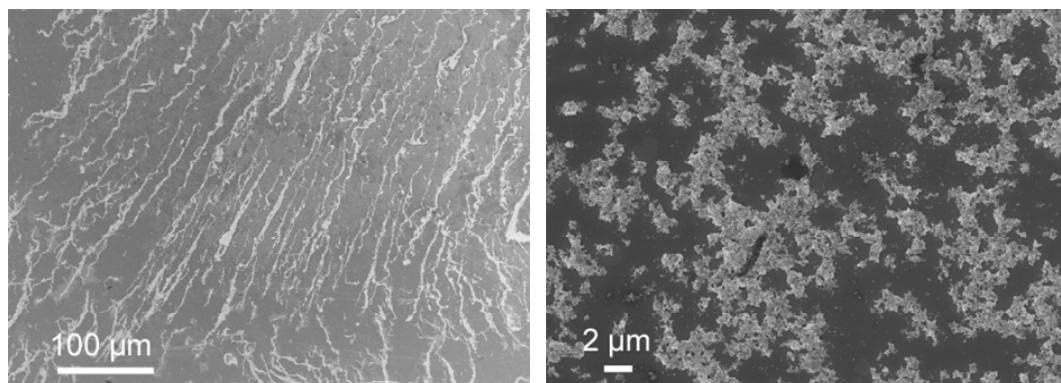

**Figure S2.** The optical images of  $\gamma\text{-Fe}_2\text{O}_3$  nanoparticle aggregates after BSA addition under different field strengths. (a) to (d) represent the 200 A, 300 A, 400 A and 500 A excitation current of a magnetic field generator, respectively.

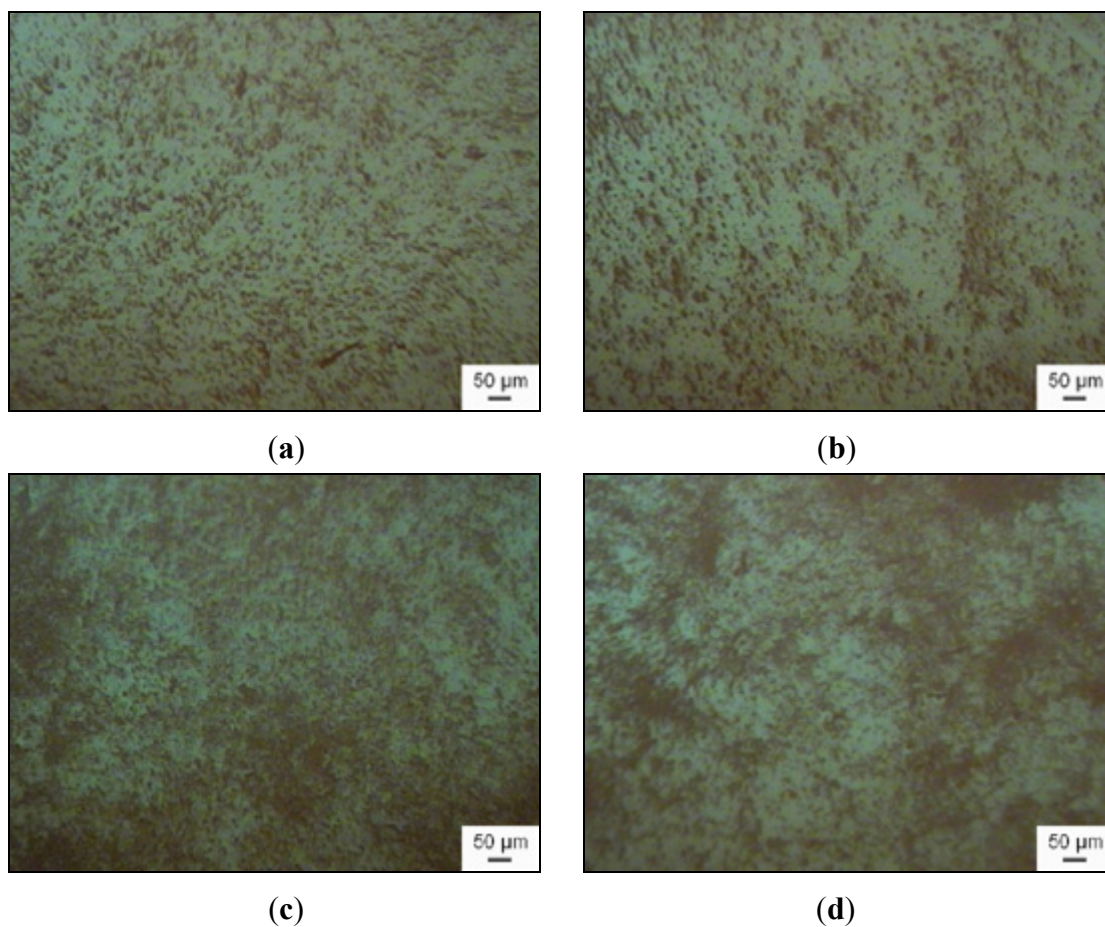

**Figure S3.** The optical images of  $\gamma$ -Fe<sub>2</sub>O<sub>3</sub> nanoparticle aggregates with different pH values after BSA addition. The excitation current of magnetic field generator is fixed in 200 A. The pH values of (a)–(i) are 6, 4.5, 4, 3.5, 3, 2.5, 7.5, 8, 8.5, 9.5, 10, and 11, respectively.

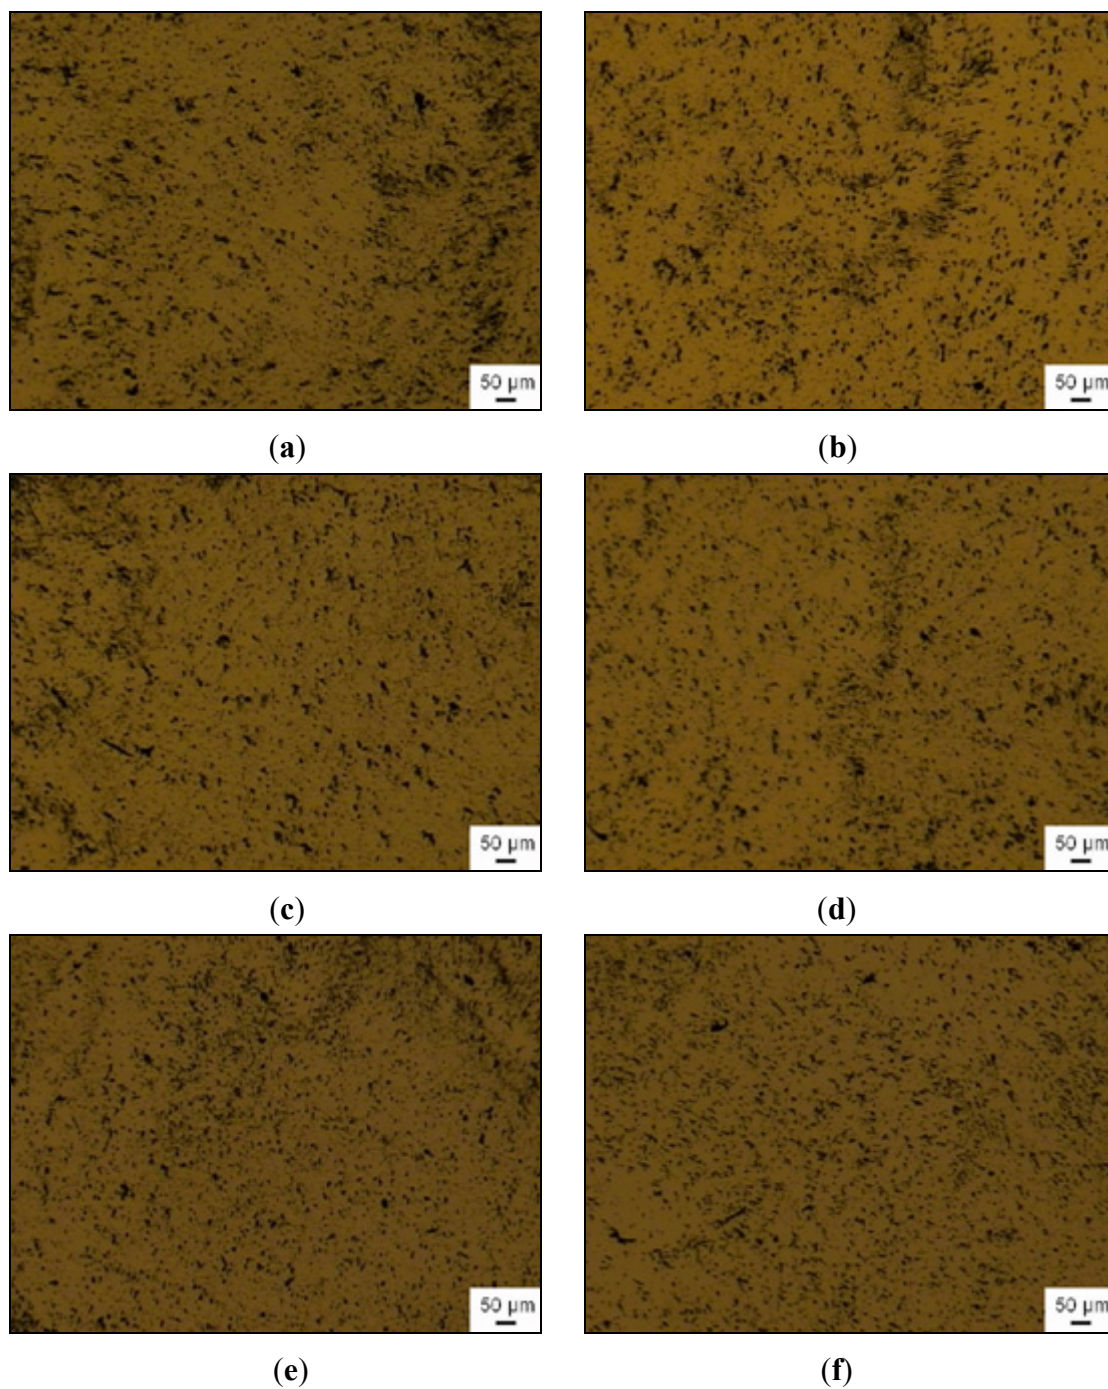

**Figure S3. Cont.**

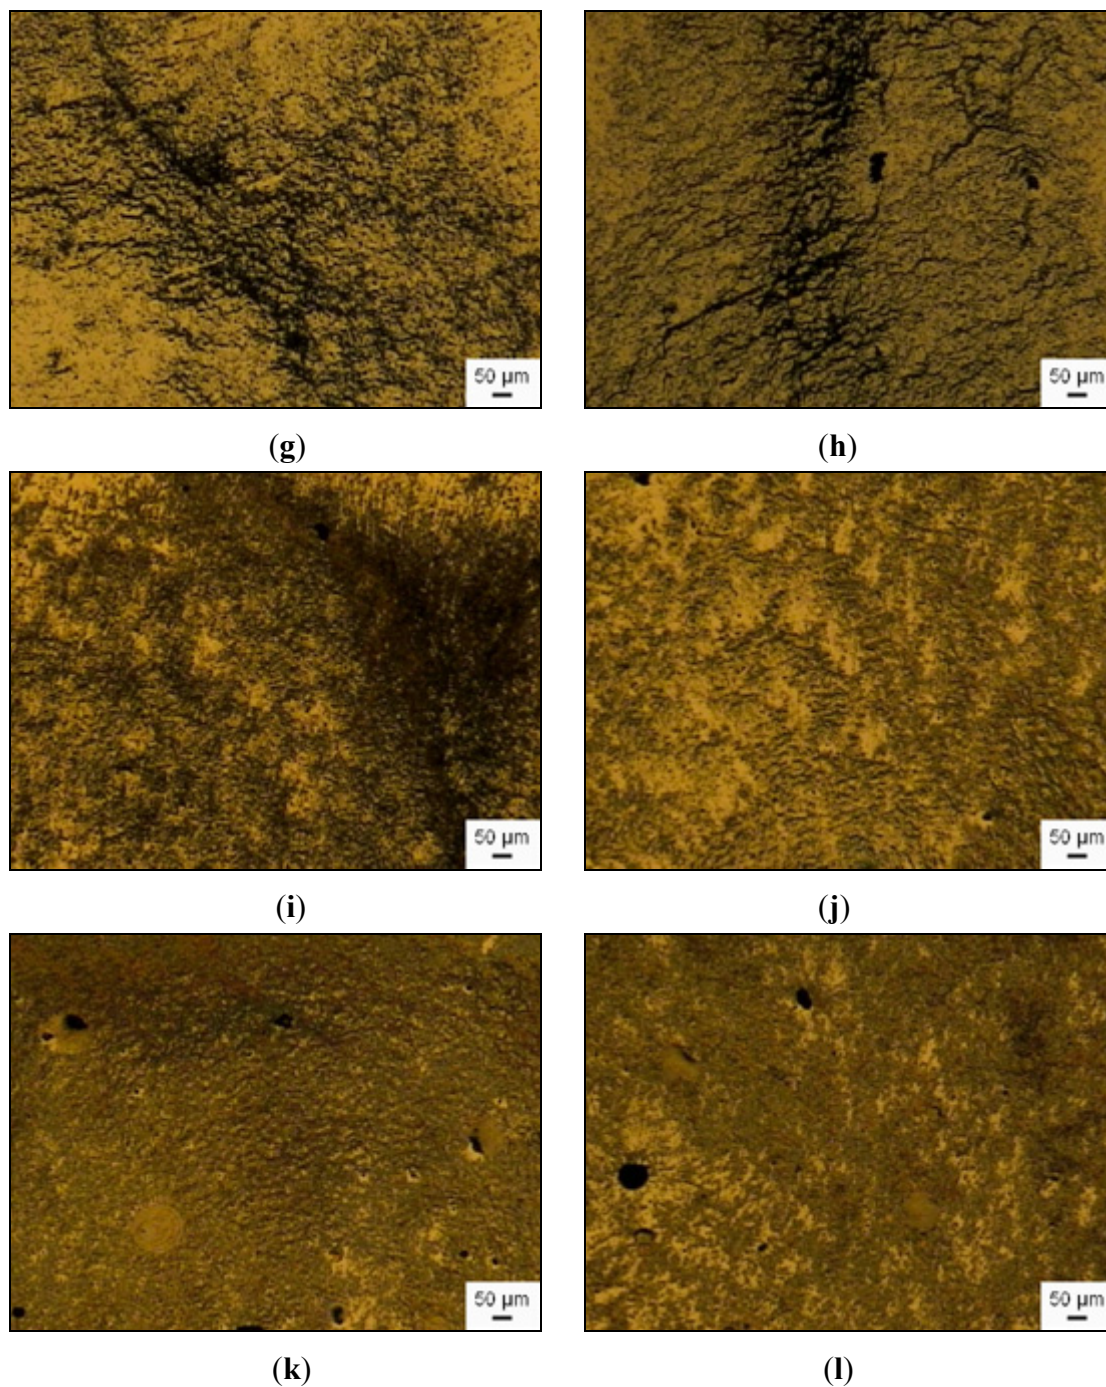

Supplement: Supplementary file 1 [file ijms-14-05775-s001.pdf]
